# Supplementary material for: Clinical evaluation of ocular biometry of dual Scheimpflug analyzer, GALILEI G6 and swept source optical coherence tomography, ANTERION
Source: PubMed Central journal article supplement (PMC8897498; doi:10.1038/s41598-022-07696-1), 2022-03-04
Supplement: 41598_2022_7696_MOESM1_ESM.pdf [file 41598_2022_7696_MOESM1_ESM.pdf]

**Clinical Evaluation of Ocular Biometry of Dual Scheimpflug Analyzer, GALILEI G6 and Swept Source Optical Coherence Tomography, ANTERION**

*Boonsong Wanichwecharungruang, MD<sup>1,2</sup>*

*Anyarak Amornpetchsathaporn, MD<sup>1</sup>*

*Kittipong Kongsomboon, MD, MBA, PhD<sup>3</sup>*

*Wisakorn Wongwijitsook, MD<sup>1</sup>*

*Kornkamol Annopawong, MD<sup>1</sup>*

*Somporn Chantra, MD<sup>1\*</sup>*

<sup>1</sup>Department of Ophthalmology, Rajavithi Hospital and Rangsit Medical College, Bangkok, Thailand.

<sup>2</sup>Department of Ophthalmology, Priest Hospital, Bangkok, Thailand.

<sup>3</sup>Department of Preventive and Social Medicine, Faculty of Medicine, Srinakharinwirot University, Nakhon Nayok, Thailand.

Running title: Evaluation of ocular biometry of ANTERION and GALILEI G6 .

\*Corresponding author: Somporn Chantra, MD.

Department of Ophthalmology, Rajavithi Hospital,

2, Phayatai Road, Bangkok,

Thailand 10400.

Tel: 66 86-541-3765

Email: [chantrasomporn@yahoo.com](mailto:chantrasomporn@yahoo.com)

Keywords: Ocular biometry, optical biometer, swept source OCT, Scheimpflug camera, agreement, IOL calculation, cataract, Bland-Altman plot

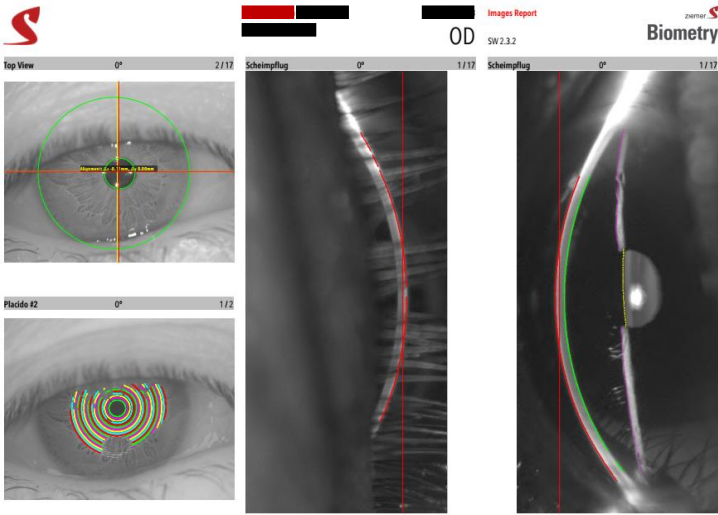

Date of birth: [REDACTED]  
Date of exam: [REDACTED]

OD

Phakic eye Target Refraction 0.0

|                 |         | n 1.3375    |             |
|-----------------|---------|-------------|-------------|
| AL              | 24.40mm | ACD         | 3.51mm      |
| Flat SimK (K1)  | 45.05D  | R1          | 7.49mm 78°  |
| Steep SimK (K2) | 45.56D  | R2          | 7.41mm 168° |
| Astig           | 0.50D   |             | 168°        |
| SimK            | 45.30D  | R           | 7.45mm      |
| CCT             | 538µm   | Mean TCPIOL | 43.75D      |
| LT              | 4.38mm  | WTW, N-T    | 11.49mm     |

**Supplementary figure 1:** Ocular biometry reported from GALILEI G6 of the right eye of a 71 year-old Thai male with diagnosis of senile cataract.

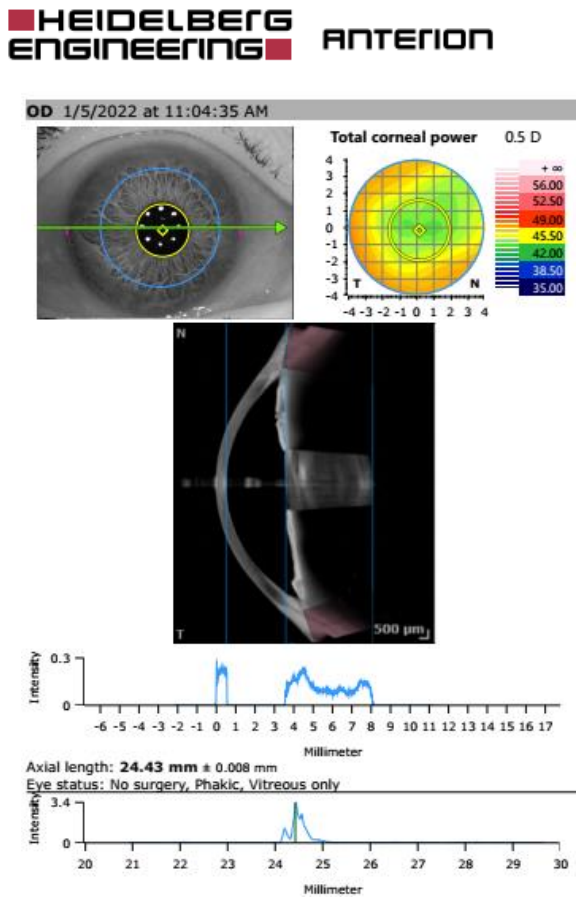

**Anterior axial curvature (simulated)**  
nk = 1.3375; 3 mm ring

SimK average 44.89 D  
SimK (steep) 45.35 D @ 100°  
SimK (flat) 44.43 D @ 10°  
Astigmatism (steep) 0.92 D @ 100°

**Astigmatism (Steep)**  
nc = 1.376; nah=1.336; 3 mm ring

Astigm. (total) 0.66 D @ 97°  
Astigm. (posterior) -0.40 D @ 104°  
Δ Ast. (anterior - total) 0.26 D @ 2°

**Total corneal wavefront**  
3 mm zone, pupil-centered

Z<sub>4</sub> Spherical aberration 0.02 µm  
RMS HOA 0.06 µm

**Pachymetry**

CCT (vertex) 523 µm

**Anterior segment**

AQD 3.07 mm  
CCT + AQD 3.59 mm  
Lens thickness 4.47 mm

**Pupil & WTW**

○ Pupil diameter 3.5 mm  
◇ Pupil center 0.25 mm (314°)  
Pupil center x/y 0.18/-0.18 mm  
|| WTW 11.55 mm

**Axial length**

Length 24.43±0.01 mm

**Supplementary figure 2:** Ocular biometry reported from ANTERION of the same eye and same patient as the supplementary figure 1.

Supplementary figures were created by MICROSOFT POWERPOINT for MICROSOFT 365 MSO (Version 2112).
